# Supplementary material for: Methyl-Donor and Cofactor Nutrient Intakes in the First 2–3 Years and Global DNA Methylation at Age 4: A Prospective Cohort Study
Source: PubMed Central journal article supplement (PMC5872691; doi:10.3390/nu10030273), 2018-02-27
Supplement: nutrients-10-00273-s001.pdf [file nutrients-10-00273-s001.pdf]

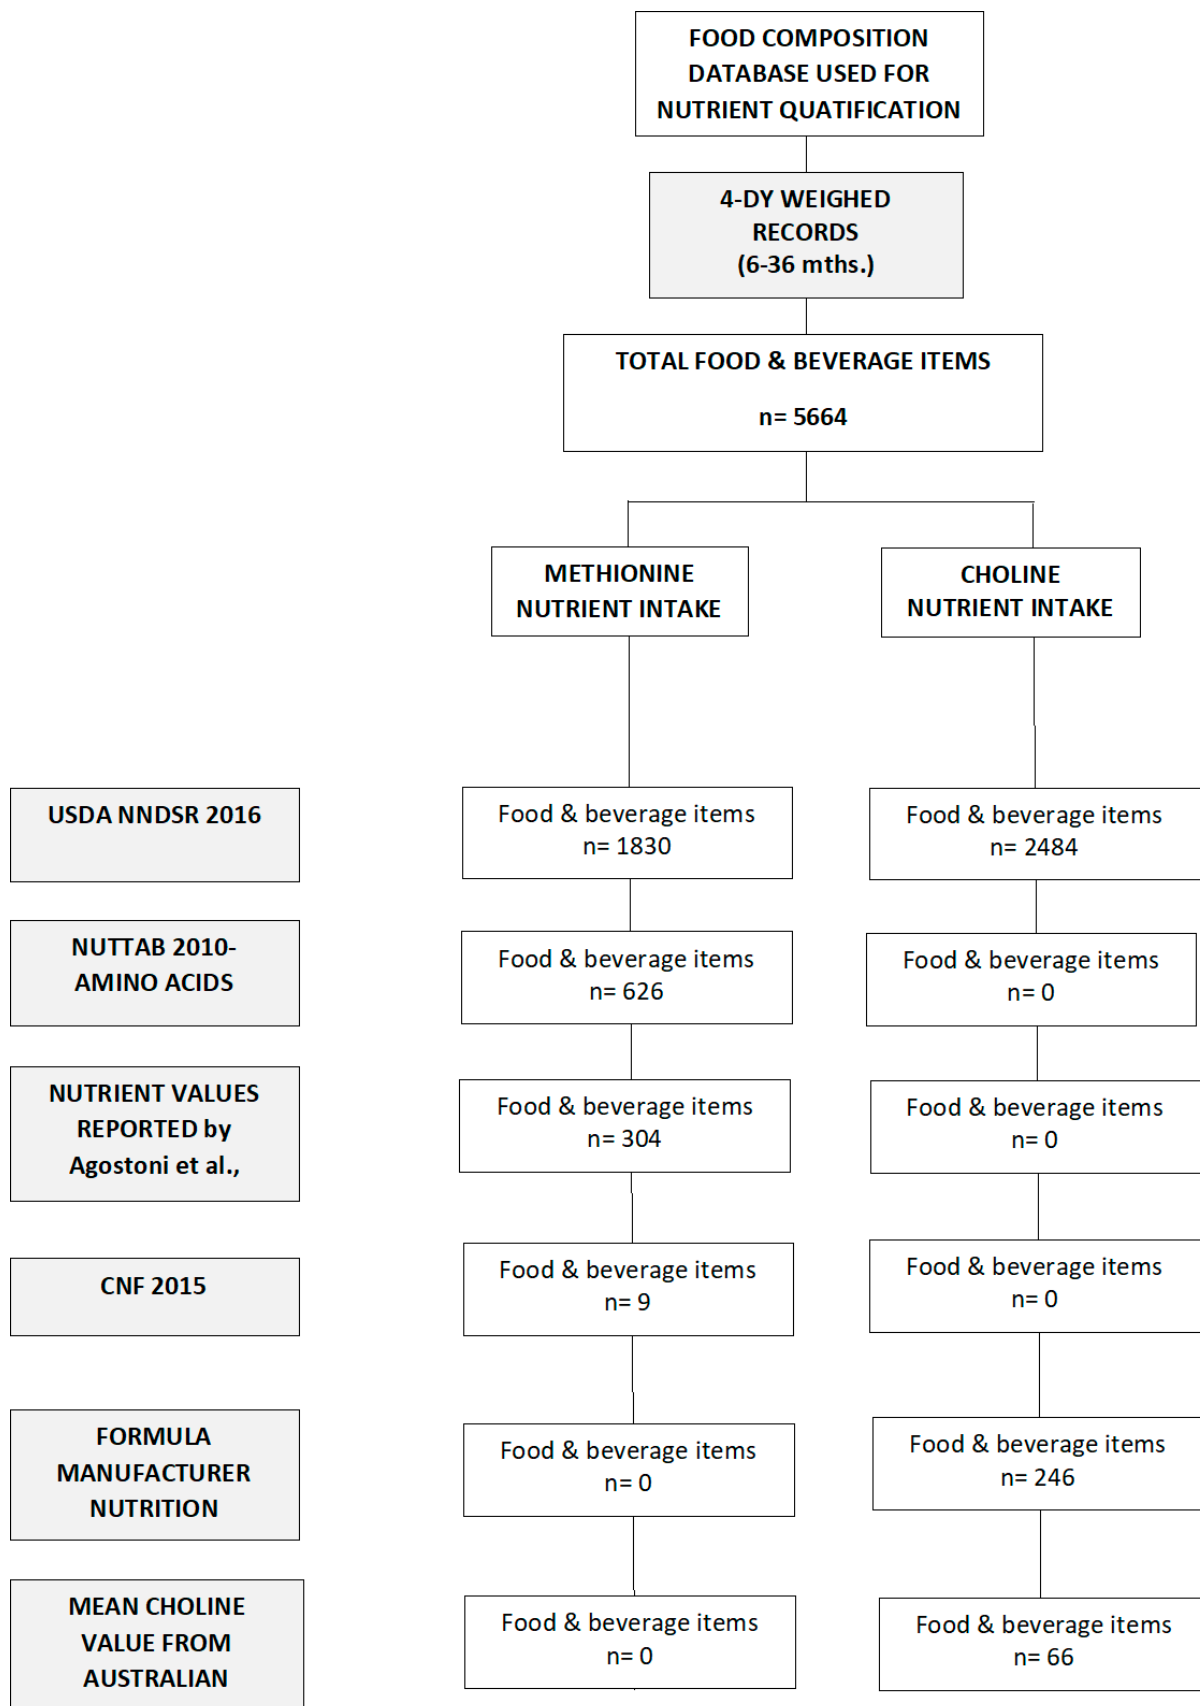

**Figure S1.** Food composition database used for methionine and choline quantification: 4-day weighed food records

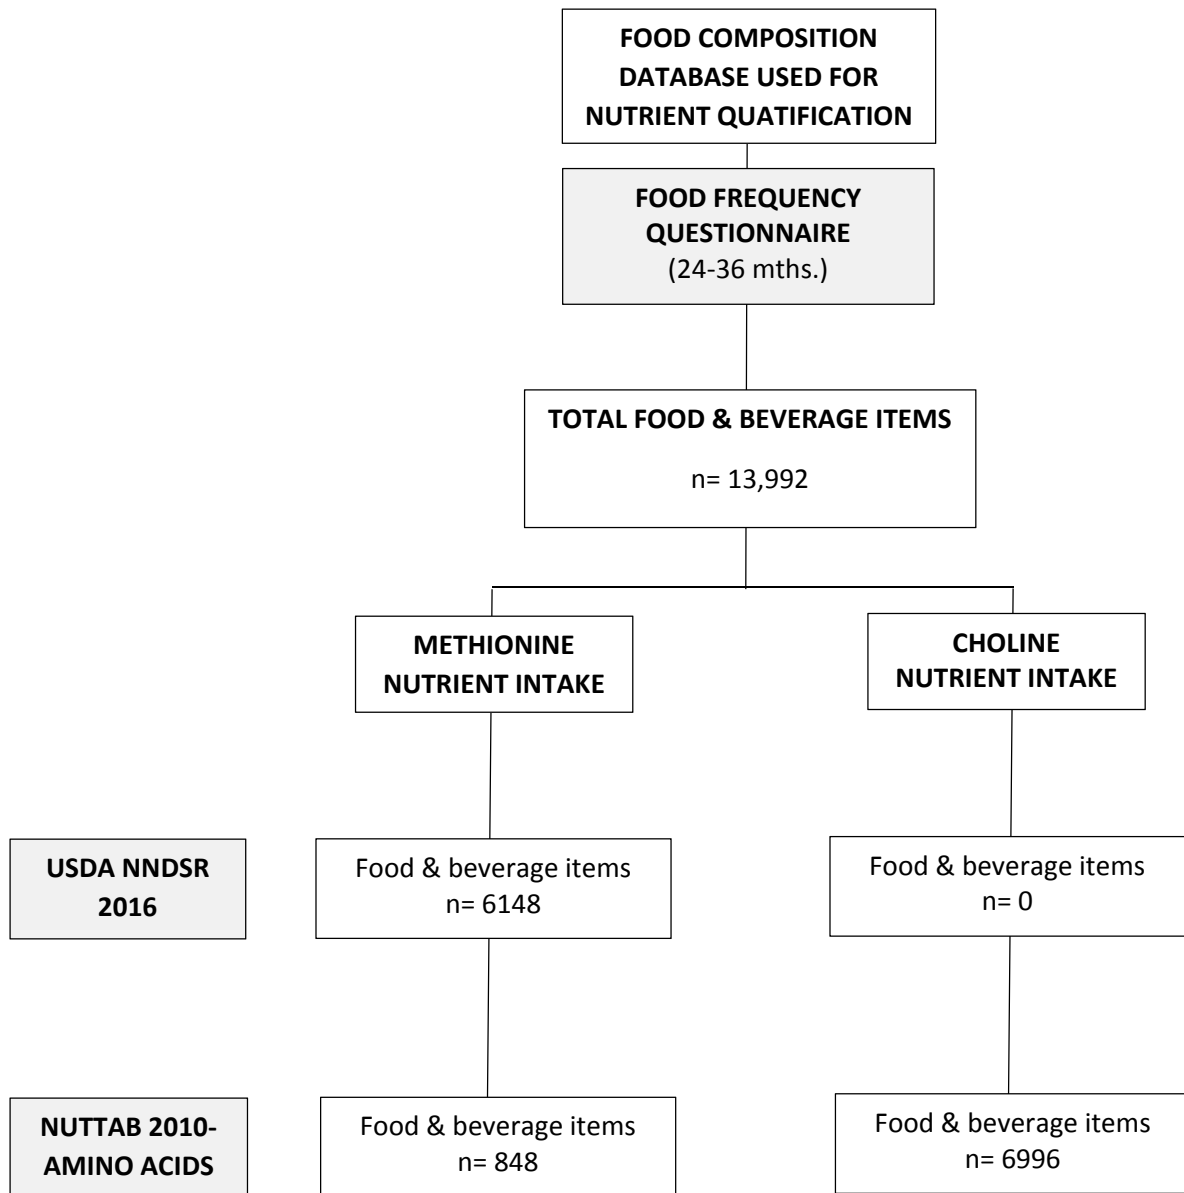

**Figure S2.** Food composition database used for methionine and choline quantification: food frequency questionnaires

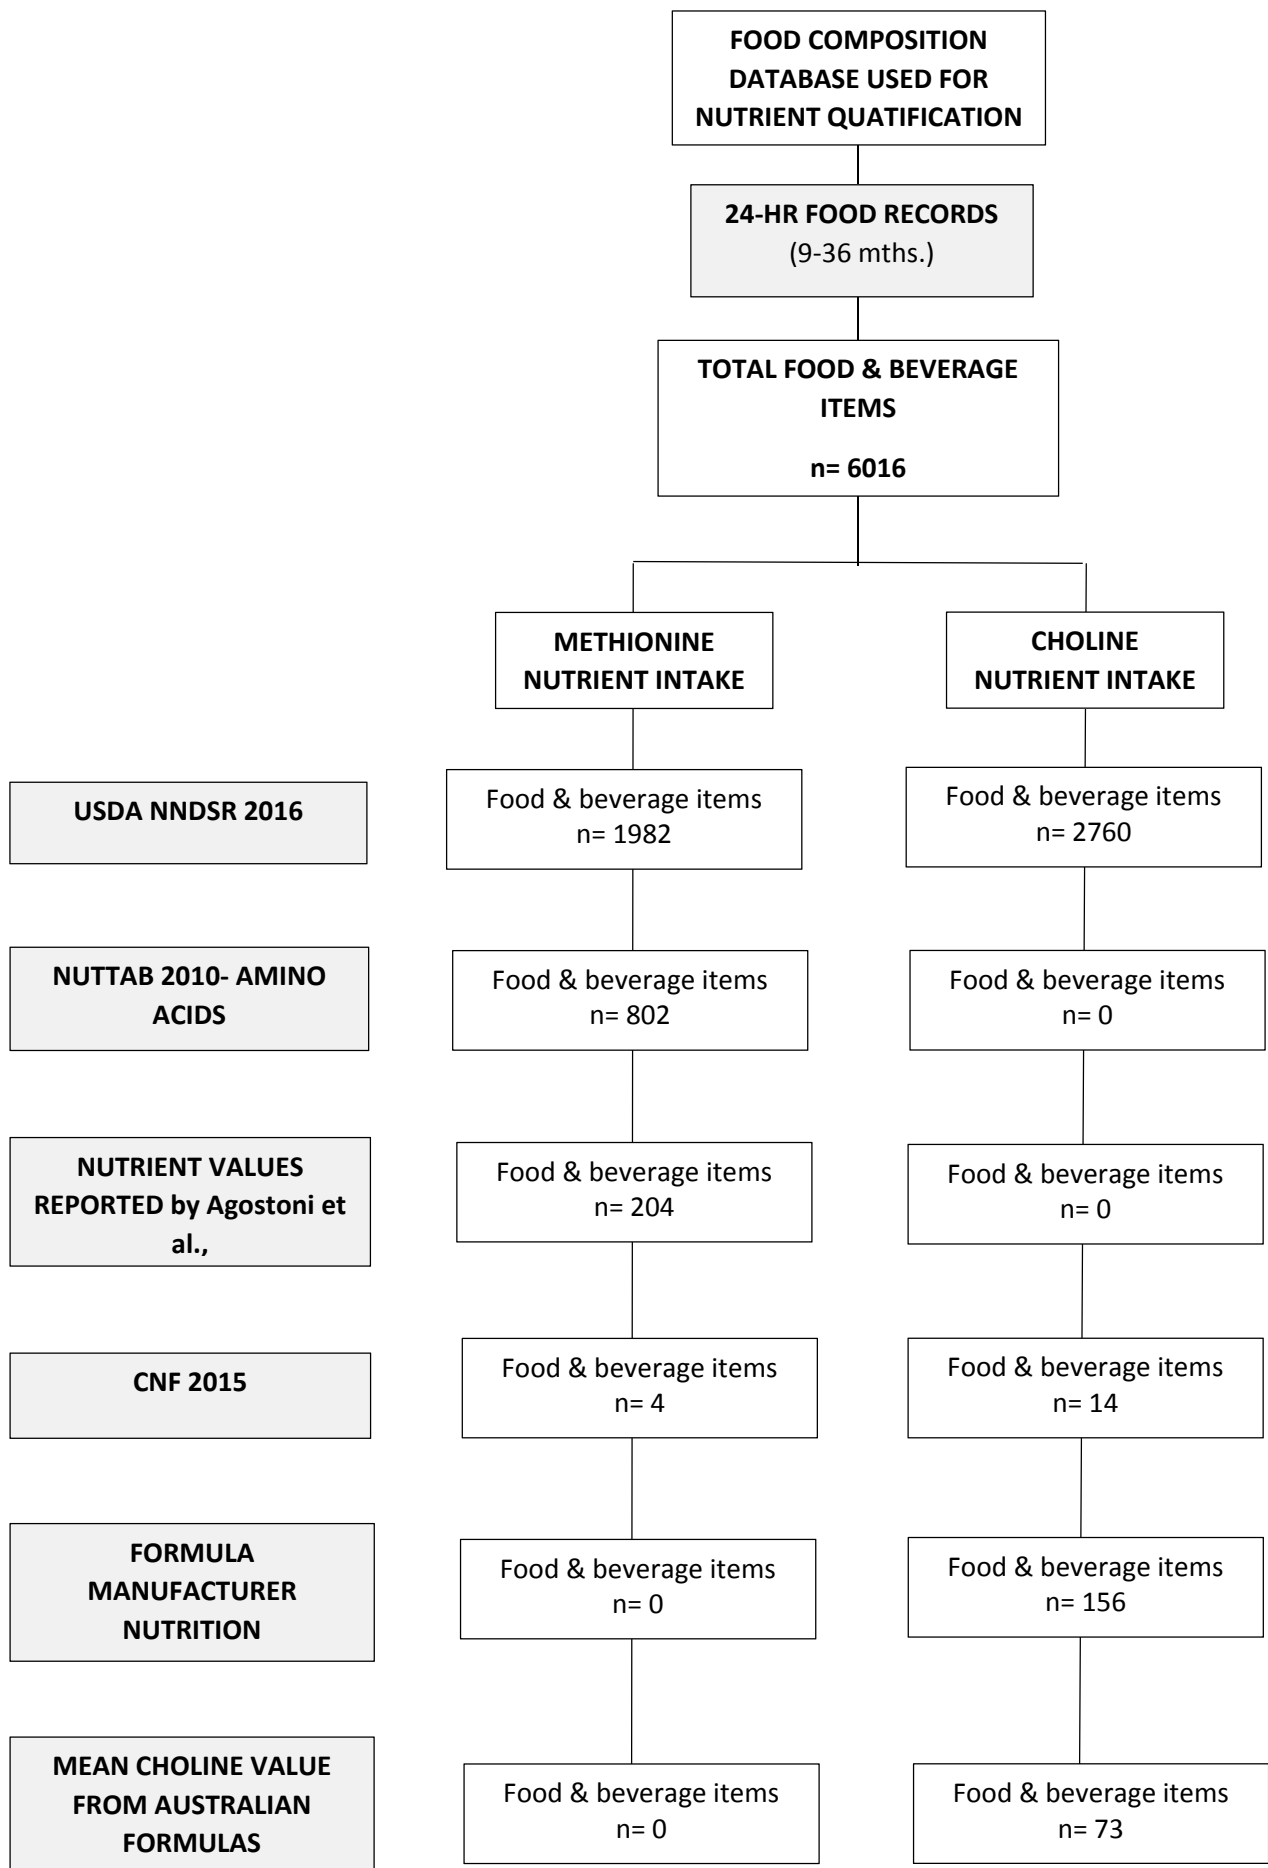

**Figure S3.** Food composition database used for methionine and choline quantification: 24-hour food recall

**Table S1. Quintiles of nutrient intake during early childhood in the WATCH cohort**

|                                  |    | Quintile range (minimum, maximum) at each time point (months) |                |                 |                  |                  |                  |
|----------------------------------|----|---------------------------------------------------------------|----------------|-----------------|------------------|------------------|------------------|
| Nutrient<br>(Total daily intake) | QR | 3                                                             | 6              | 9               | 12               | 24               | 36               |
| Methionine, mg<br>(Amino acid)   | 1  | (1.6, 2.3)                                                    | (5.0, 123.0)   | (3.5, 202.6)    | (11.1, 384.9)    | (470.7, 704.3)   | (444.1, 743.1)   |
|                                  | 2  | (2.6, 156.8)                                                  | (128.0, 167.1) | (235.5, 355.0)  | (387.5, 495.2)   | (756.4, 1001.6)  | (811.7, 974.9)   |
|                                  | 3  | (156.8, 173.3)                                                | (174.0, 220.6) | (381.3, 458.0)  | (558.9, 874.5)   | (1060.7, 1165.3) | (1000.7, 1263.0) |
|                                  | 4  | (176.4, 193.3)                                                | (231.2, 267.8) | (462.2, 540.5)  | (891.3, 1120.9)  | (1219.2, 1404.7) | (1278.3, 1478.2) |
|                                  | 5  | (195.1, 318.3)                                                | (290.5, 726.1) | (545.6, 1259.0) | (1204.1, 2651.9) | (1404.9, 1696.2) | (1503.5, 2262.8) |
| Vit. B2, mg<br>(Riboflavin)      | 1  | (0.1, 0.2)                                                    | (0.1, 0.3)     | (0.1, 0.4)      | (0.2, 1.0)       | (0.9, 1.4)       | (0.3, 1.3)       |
|                                  | 2  | (0.2, 0.2)                                                    | (0.3, 0.3)     | (0.5, 0.6)      | (1.0, 1.7)       | (1.4, 1.7)       | (1.3, 1.7)       |
|                                  | 3  | (0.2, 0.3)                                                    | (0.3, 0.4)     | (0.7, 1.1)      | (1.8, 2.7)       | (1.8, 2.3)       | (1.8, 2.2)       |
|                                  | 4  | (0.3, 0.3)                                                    | (0.4, 0.7)     | (1.2, 1.5)      | (2.9, 4.1)       | (2.3, 3.2)       | (2.2, 3.0)       |
|                                  | 5  | (0.3, 1.4)                                                    | (0.7, 1.4)     | (1.5, 4.3)      | (4.1, 9.5)       | (3.4, 610.4)     | (3.1, 4.6)       |
| Vit. B6, mg<br>(Pyridoxine)      | 1  | (0.0, 0.1)                                                    | (0.1, 0.1)     | (0.1, 0.3)      | (0.1, 0.5)       | (0.0, 0.1)       | (0.0, 0.3)       |
|                                  | 2  | (0.1, 0.1)                                                    | (0.1, 0.3)     | (0.3, 0.4)      | (0.5, 0.6)       | (0.2, 0.4)       | (0.3, 0.6)       |
|                                  | 3  | (0.1, 0.1)                                                    | (0.3, 0.4)     | (0.4, 0.5)      | (0.7, 0.8)       | (0.4, 0.6)       | (0.6, 0.7)       |
|                                  | 4  | (0.1, 0.4)                                                    | (0.4, 0.5)     | (0.5, 0.6)      | (0.8, 1.0)       | (0.6, 0.8)       | (0.7, 1.0)       |
|                                  | 5  | (0.4, 0.6)                                                    | (0.5, 0.7)     | (0.6, 1.7)      | (1.0, 2.1)       | (0.9, 1.8)       | (1.2, 2.8)       |
| Vit. B12, µg<br>(Cobalamin)      | 1  | *                                                             | (0.0, 0.0)     | (0.0, 0.4)      | (0.0, 1.3)       | (0.6, 1.7)       | (0.9, 2.2)       |
|                                  | 2  | (0.0, 0.0)                                                    | (0.0, 0.1)     | (0.5, 1.1)      | (1.3, 2.0)       | (2.0, 3.2)       | (2.2, 2.8)       |
|                                  | 3  | *                                                             | (0.1, 0.6)     | (1.2, 1.7)      | (2.0, 2.8)       | (3.5, 4.9)       | (2.8, 3.6)       |
|                                  | 4  | (0.1, 1.2)                                                    | (0.6, 1.6)     | (1.7, 2.2)      | (3.0, 4.9)       | (5.0, 7.1)       | (3.7, 5.6)       |
|                                  | 5  | (1.3, 2.0)                                                    | (1.6, 2.5)     | (2.4, 4.5)      | (5.1, 7.8)       | (7.3, 11.6)      | (5.7, 16.8)      |
| Choline, mg                      | 1  | (12.1, 88.0)                                                  | (58.4, 95.3)   | (84.2, 109.0)   | (80.5, 116.4)    | (108.4, 142.4)   | (63.0, 127.5)    |
|                                  | 2  | (88.0, 99.7)                                                  | (95.6, 116.4)  | (114.7, 126.1)  | (120.2, 141.5)   | (147.0, 173.2)   | (130.7, 168.5)   |
|                                  | 3  | (99.8, 108.8)                                                 | (117.2, 130.0) | (129.4, 138.0)  | (143.6, 162.8)   | (174.5, 202.2)   | (182.2, 204.9)   |
|                                  | 4  | (110.5, 120.3)                                                | (131.5, 144.2) | (139.2, 157.6)  | (163.5, 198.9)   | (203.1, 240.6)   | (205.6, 238.1)   |
|                                  | 5  | (123.5, 175.0)                                                | (155.5, 415.7) | (157.8, 308.7)  | (199.7, 339.1)   | (240.9, 440.7)   | (240.3, 385.0)   |
| Folate, µg                       | 1  | (19.9, 31.2)                                                  | (18.6, 44.7)   | (27.8, 66.1)    | (35.3, 109.2)    | (125.3, 179.3)   | (80.9, 190.7)    |
|                                  | 2  | (31.3, 35.2)                                                  | (47.4, 51.6)   | (69.1, 93.0)    | (111.7, 196.6)   | (201.5, 222.5)   | (190.7, 239.4)   |
|                                  | 3  | (35.4, 38.7)                                                  | (52.1, 65.7)   | (98.5, 120.6)   | (206.6, 313.0)   | (228.9, 270.6)   | (248.1, 345.0)   |
|                                  | 4  | (38.8, 65.0)                                                  | (69.5, 92.5)   | (121.4, 209.0)  | (358.7, 597.1)   | (292.1, 398.7)   | (362.6, 477.3)   |
|                                  | 5  | (70.4, 101.4)                                                 | (96.9, 216.0)  | (211.8, 722.3)  | (617.7, 1602.3)  | (434.2, 812.1)   | (496.9, 1367.2)  |

\* Vitamin B12 had numerous zero values for the 3 month time period, therefore all grouped into rank value = 2

QR: quintile rank, Vit: vitamin
